# Supplementary material for: Effects of a priori profile shape assumptions oncomparisons between satellite NO 2 columns and model simulations
Source: Copernicus journal article supplement (doi:10.5194/acp-2020-88), 2020-02-28
Supplement: Supplementary file [file acp-2020-88-RC1-supplement.pdf]

# Review of Cooper et al.

March 25, 2020

Cooper et al. “Effects of *a priori* shape assumptions on comparisons between satellite NO<sub>2</sub> columns and model simulations” presents a case study using synthetic OMI observations and the GEOS-Chem adjoint to show how different methods of accounting for the vertical sensitivity of satellite NO<sub>2</sub> measurements when comparing to model NO<sub>2</sub> fields affects emissions inferred from said comparison. This paper may have been a better fit for GMD rather than ACP, as it primarily touches on model comparison, but is also relevant to the remote sensing community as it informs what information must be contained in satellite products for effective model comparison, and to the broader atmospheric community for understanding possible sources of error in constrained emissions, so ACP is also appropriate.

I do have two concerns about the experimental design. First, I question whether using scattering weights computed for average OMI observing geometry in a  $4^\circ \times 5^\circ$  grid cell is appropriate for creating synthetic observations. Second, some of the choices for prior test cases are not very relevant to current NO<sub>2</sub> retrievals. I will address these more below. If the authors can address these concerns, then this manuscript should be published in ACP.

## Major concerns

### Representativeness of average scattering weights

In sect. 3.2.1, line 226, the authors say: “To represent typical conditions, average scattering weight profiles for each grid box are found by averaging scattering weights for OMI observations during July 2010.” I have two questions about this. First, it is ambiguous whether the mean scattering weights in question are found by averaging weights providing in the product (implied by “...average scattering weight profiles for each grid box are found by averaging scattering weights for OMI observations during July 2010...”) or by using the average viewing conditions to compute the scattering weight vector for the average viewing angles, albedo, surface pressure, etc. (implied by “...OMI scattering weights are calculated using the LIDORT radiative transfer model (Spurr, 2002) by providing LIDORT with the observation geometry of the OMI observations and aerosol profiles from the GEOS-Chem base simulation...”). I’m assuming the latter, but this could be made clearer.

Assuming that the authors calculated their own scattering weights from the average viewing conditions, my second concern is that while this simplifies the problem of computing synthetic observations for each model step, it may not adequately represent the variation in

OMI measurements during that time. Scattering weights depend nonlinearly on observation geometry, so:

$$w(z|\bar{\theta}_s, \bar{\theta}_v, \bar{\phi}, \bar{a}_{\text{surf}}, \bar{p}_{\text{surf}}) \neq \frac{1}{c_{\text{obs}}} \sum_{i=1}^{c_{\text{obs}}} w(z|\theta_{s,i}, \theta_{v,i}, \phi_i, a_{\text{surf},i}, p_{\text{surf},i})$$

where  $\theta_s$  is the solar zenith angle,  $\theta_v$  the viewing zenith angle,  $\phi$  the relative azimuth angle,  $a$  the surface reflectivity,  $p_{\text{surf}}$  the surface pressure, and overlined quantities represent grid cell averages. In other words, the vector of scattering weights corresponding to the average observation conditions is not guaranteed to be the same as the average of scattering weight vectors for all individual observations. Concretely, consider two observations, one with a viewing zenith angle of  $0^\circ$  and one at  $\sim 60^\circ$ . The average of these two observations' scattering weights is not guaranteed to be the same as for an observation of  $30^\circ$ .

That being said, it may well be close enough, especially averaged over a  $4^\circ \times 5^\circ$  grid cell. If the authors can show that the difference between using mean scattering weights and the mean of synthetic observations computed using individual OMI observation scattering weights is within the measurements' uncertainty for at least a few days of synthetic observations, then I think that would be adequate.

## Relevance of prior test cases

Of the shape factor test cases described in sect. 3.2.2, the  $SF_{\text{trop}}$  and  $SF_{\text{BL}}$  cases are not particularly relevant for satellite measurements. Both of the two main global OMI  $\text{NO}_2$  retrievals (NASA SP3, Krotkov et al. 2017; QA4ECV, see Williams et al. 2016 for the  $\text{NO}_2$  profiles) use  $\sim 1^\circ$  resolution for their  $\text{NO}_2$  profiles. Therefore, the  $SF_{\text{BL}}$  and  $SF_{\text{trop}}$  cases, which assume one profile globally are not representative of any major satellite product. In fact, the more relevant question, assuming that  $4^\circ \times 5^\circ$  is still a common resolution for adjoint modeling, is what happens if the satellite prior is *higher* resolution than the model profile.

In my opinion, a sixth test case similar to  $SF_{\text{prior}}$  but using a set of priors from a  $2^\circ \times 2.5^\circ$  or  $1^\circ \times 1.25^\circ$  GEOS-Chem simulation would add value to the paper by studying the effect of having the satellite product's prior at higher spatial resolution than the adjoint model. Also, if the  $SF_{\text{BL}}$  and  $SF_{\text{trop}}$  cases are retained, it should be clearly stated that they represent extreme cases that do not represent any modern  $\text{NO}_2$  product.

## Other primary concerns

- In sect. 3.2, line 210, the authors say that they use one observation per grid box per hour. But OMI will only observe a given location twice per day, maximum, and usually only once per day at about 13:30 local standard time. Are you then filtering these once-per-hour observations down to the ones OMI would actually observe?
- I don't follow Eq. (20). Specifically why  $\mathbf{n}_a$  shows up on the right hand side. Given that:

$$M(\mathbf{n}) = \frac{\sum_i \mathbf{w}_i \mathbf{n}_i}{\sum_i \mathbf{n}_i}$$

and

$$\mathbf{A}_i(\mathbf{n}) = \frac{\mathbf{w}_i}{M(\mathbf{n})}$$

then to compute  $M(\mathbf{n}_m)$  given  $\mathbf{A}(\mathbf{n}_a)$  you only need to multiply  $\mathbf{A}(\mathbf{n}_a)$  by  $M(\mathbf{n}_a)$  to extract the necessary scattering weights:

$$\begin{aligned} M(\mathbf{n}_m) &= \frac{\sum_i \mathbf{w}_i \mathbf{n}_{m,i}}{\sum_i \mathbf{n}_{m,i}} \\ \mathbf{w}_i &= \mathbf{A}_i(\mathbf{n}_a) \cdot M(\mathbf{n}_a) \\ \therefore M(\mathbf{n}_m) &= \frac{\sum_i \mathbf{A}_i(\mathbf{n}_a) M(\mathbf{n}_a) \mathbf{n}_{m,i}}{\sum_i \mathbf{n}_{m,i}} \\ &= M(\mathbf{n}_a) \frac{\sum_i \mathbf{A}_i(\mathbf{n}_a) \mathbf{n}_{m,i}}{\sum_i \mathbf{n}_{m,i}} \end{aligned}$$

I don't think you need  $\mathbf{n}_a$  to compute  $M(\mathbf{n}_m)$  as long as  $M(\mathbf{n}_a)$  is included in the satellite data (both the NASA SP3 and QA4ECV OMI NO<sub>2</sub> products include the tropospheric AMFs), and given only the AKs and prior profile, it would be difficult if not impossible to compute  $M(\mathbf{n}_a)$ . That means the statement on line 320 about needing the a priori profiles in the dataset is incorrect.

## Minor corrections

- For Eq. (8), it would be good to make clear that  $\mathbf{A}(z)$  is the column averaging kernel and therefore a vector, since in Rodgers and Conner, the capital  $\mathbf{A}$  is typically the full AK matrix. But I agree that following the convention in Eskes and Boersma (2003) is best.
- Eq. (9) doesn't seem to be used anywhere else in the paper, and technically is inconsistent with the implicit definition of  $\mathbf{w}(z)$  in Eq (8). Recommend removing Eq. (9).
- In Eq. (17) and Eq. (18) it's unclear what is being summed. Recommend using  $i$  subscripts to make clear what terms are iterated in the sum.
- On line 198 in sect. 3.1, the authors say that  $\Delta$  is computed using either Eq. (12) or (17). Given that much of sect. 2 was spent establishing that these two equations differ, this should be clarified. If I understood correctly, which equation is used effectively depends on which shape factor was used for a given test. If so, I recommend saying that explicitly.

- For the different shape factors, have you considered the impact of profiles simulated by a model with systematically, rather than randomly (as in  $SF_{n30}$ ), different emissions?

## References

- Eskes, H. J. and Boersma, K. F.: Averaging kernels for DOAS total-column satellite retrievals, *Atmospheric Chemistry and Physics*, 3, 1285–1291, doi:10.5194/acp-3-1285-2003, URL <https://www.atmos-chem-phys.net/3/1285/2003/>, 2003.
- Krotkov, N. A., Lamsal, L. N., Celarier, E. A., Swartz, W. H., Marchenko, S. V., Bucsela, E. J., Chan, K. L., Wenig, M., and Zara, M.: The version 3 OMI NO<sub>2</sub> standard product, *Atmospheric Measurement Techniques*, 10, 3133–3149, doi:10.5194/amt-10-3133-2017, URL <https://doi.org/10.5194/amt-10-3133-2017>, 2017.
- Williams, J. E., Boersma, K. F., Sager, P. L., and Verstraeten, W. W.: The high-resolution version of TM5-MP for optimised satellite retrievals: Description and Validation, doi: 10.5194/gmd-2016-125, URL <https://doi.org/10.5194/gmd-2016-125>, 2016.
